# Supplementary material for: Clinical Features, Cardiovascular Risk Profile, and Therapeutic Trajectories of Patients with Type 2 Diabetes Candidate for Oral Semaglutide Therapy in the Italian Specialist Care
Source: PubMed Central journal article supplement — Diabetes Ther. 2023 Oct 18;14(12):2159–72. doi: 10.1007/s13300-023-01490-6 (PMC10597935; doi:10.1007/s13300-023-01490-6), 2023-10-18
Supplement: 13300_2023_1490_MOESM1_ESM.pdf [file 13300_2023_1490_MOESM1_ESM.pdf]

## Supplementary material to:

### Clinical features, cardiovascular risk profile, and therapeutic trajectories of patients with type 2 diabetes candidate for oral semaglutide therapy in the Italian specialist care

#### Authors

Mario Luca Morieri<sup>1</sup>, Riccardo Candido<sup>2</sup>, Simona Frontoni<sup>3†</sup>, Olga Disoteco<sup>4</sup>, Anna Solini<sup>5</sup>, Gian Paolo Fadini<sup>1,6</sup> for the PIONEERING EXPERIENCE study group<sup>7</sup>

#### Affiliations

<sup>1</sup> Division of Metabolic Diseases, Department of Medicine, University of Padova, Padua, Italy

<sup>2</sup> Diabetes Centre, Azienda Sanitaria Universitaria Giuliano Isontina (ASUGI), University of Trieste, Trieste, Italy

<sup>3</sup> Unit of Endocrinology, Diabetes and Metabolism, S. Giovanni Calibita Fatebenefratelli Hospital, Department of Systems Medicine, University of Rome Tor Vergata, Rome, Italy. †Died during the publication process.

<sup>4</sup> Diabetes Unit, Niguarda Hospital, Milan, Italy

<sup>5</sup> Department of Surgical, Medical, Molecular and Critical Area Pathology, University of Pisa, Pisa, Italy

<sup>6</sup> Veneto Institute of Molecular Medicine, Padua, Italy

<sup>7</sup> see Supplementary material

#### Correspondence to:

Gian Paolo Fadini, MD PhD  
 Professor of Endocrinology  
 University of Padova, Department of Medicine  
 Via Giustiniani 2, 35128 Padua, Italy.  
 Phone +39 049 8214318  
[gianpaolo.fadini@unipd.it](mailto:gianpaolo.fadini@unipd.it)

| Content                                                                                                                              | Page |
|--------------------------------------------------------------------------------------------------------------------------------------|------|
| Members of the Pioneering Experience Study Group                                                                                     | 2    |
| Figure S1. Patients selection and flow-chart                                                                                         | 4    |
| Figure S2. Heatmap showing the relationship between main clinical characteristics and reason to choose oral semaglutide as treatment | 5    |
| Table S1. Expected HbA1c reduction after add-on of oral semaglutide according to background regimen                                  | 6    |
| Table S2. Characteristics of patients according to specific subgroups of background regimen                                          | 7    |

## Members of the Pioneering Experience Study Group

**Tutors:** Francesco Bellanti, Foggia; Massimiliano Caprio, Latina; Michele Cutolo, Napoli; Gloria Formoso, Chieti; Elisa Forte, Latina; Vera Frison, Padova; Giovanna Gregori, Massa-Carrara; Cristina Lencioni, Lucca; Gaetano Leto, Roma; Salvatore Mandica, Roma; Alberto Marangoni, Vicenza; Pasqualina Memoli, Salerno; Giuseppe Memoli, Avellino; Carlo Negri, Verona; Laura Nollino, Treviso; Andrea Perrelli, Napoli; Sebastio Perrini, Bari; Flavia Prodam, Torino; Alberto Rebor, Genova; Daniela Sansone, Torino; Marcello Sciaraffia, Taranto; Silvio Settembrini, Napoli; Gaetano Sodo, Caserta; Francesco Tassone, Cuneo; Valentina Todisco, Brindisi; Antonio Vetrano, Caserta.

**Participants:** Giacomo Accardo, Napoli; Valeria Albanese, Genova; Irene Alemanno, Lecce; Stefano Allasia, Torino; Rosario Alosa, Napoli; Anna Altomari, Belluno; Anna Maria Letizia Amato, Firenze; Eleonora Ambrosetti, Genova; Angela Angarano, Bari; Stefania Angotti, Roma; Roberto Anichini, Pistoia; Fabio Baccetti, Massa-Carrara; Marcella Balbo, Torino; Elisabetta Balestra, Brindisi; Sara Balzano, Padova; Maria Barone, Caserta; Walter Baronti, Pisa; Veronica Basso, Alessandria; Guglielmo Beccuti, Torino; Iaele Maria Bellone, Torino; Alessandra Bertolotto, Pisa; Michela Bettio, Padova; Cristina Bittante, Treviso; Nadia Bonelli, Torino; Marzia Bongiovanni, Roma; Benedetta Maria Bonora, Padova; Barbara Bonsembiante, Padova; Laura Borgognoni, Roma; Daniela Bracaglia, Frosinone; Antonia Francesca Braione, Taranto; Clementina Brancario, Napoli; Sabrina Braucci, Roma; Lucia Briatore, Savona; Elisabetta Brun, Vicenza; Valeria Cambria, Messina; Elena Cantino, Torino; Paolo Capitanata, Caserta; Sergio Cappello, Bari; Marina Caputo, Novara; Barbara Carabba, Roma; Alberto Carpenito, Avellino; Marco Castellana, Bari; Anna Castrovilli, Barletta-Andria-Trani; Donato Cataldo, Avellino; Giuliana Cazzetta, Lecce; Francesca Cecoli, Genova; Nino Cristiano Chilelli, Vicenza; Marco Cianciullo, Salerno; Federica Coccia, Roma; Sara Colarusso, Benevento; Caterina Colella, Napoli; Isabella Colletti, Palermo; Sara Coluzzi, Fermo; Marisa Conte, Napoli; Marco Corigliano, Napoli; Alessandra Cosma, Treviso; Silvana Costa, Vicenza; Pantaleo Daniele, Lecce; Maria D'aurizio, Chieti; Alessandra De Bellis, Firenze; Lorenzo De Candia, Bari; Giovanni De Gennaro, Bari; Ezechiele De Luca, Napoli; Claudia De Natale, Torino; Giuseppina De Simone, Napoli; Raffaele De Simone, Napoli; Andrea Del Buono, Caserta; Vincenza Delmonte, Bari; Eleonora Devangelio, Taranto; Nicolina Di Biase, Roma; Giuseppe Di Giovanni, Napoli; Mariarosaria Di Palo, Napoli; Caterina Divella, Bari; Mara Dolcino, Alessandria; Oreste Egione, Napoli; Anna Farese, Foggia; Saverio Fatone, Bari; Alessio Filippi, Padova; Daniela Fiore, Latina; Paolo Fiorentini, Viterbo; Rossana Fiori, Roma; Maria Rosa Fittipaldi, Salerno; Giuseppina Floriddia, Taranto; Luca Franco, Napoli; Alessandra Fusco, Napoli; Sergio Galdieri, Napoli; Alessandra Gallo, Padova; Maria Alessandra Gardini, Roma; Francesca Garino, Torino; Adriano Gatti, Napoli; Valentina Gatto, Torino; Carlotta Gauna, Torino; Luigi Gesuè, Napoli; Anna Giacchini, Roma; Raffaele Giannettino, Napoli; Debora Giannini, Roma; Filomena Gioia, Salerno; Domenica Giuffrida, Torino; Umberto Goglia, Cuneo; Francesco Golia, Napoli; Lucia Gottardo, Venezia; Elena Gramaglia, Torino; Marco Grasso, Padova; Massimo Graziuso, Lecce; Roberto Gualdiero, Napoli; Rita Graziella Guarnieri, Catanzaro; Nicolangelo Iazzetta, Napoli; Marco Infante, Roma; Francesca Innelli, Salerno; Angelantonio Iovino, Napoli; Giovanni Izzo, Avellino; Antonio Lampitella, Caserta; Antonio Lanzilli, Napoli; Emanuela Lapice, Napoli; Anna Pia Lassandro, Roma; Adele Latina, Siracusa; Mario Laudato, Caserta; Angelo Lauria Pantano, Roma; Paola Laporati, Alessandria; Filomena Lo Conte, Bari; Barbara Giovanna Lucatello, Torino; Tiziano Lucianer, Trento; Barbara Macerola, L'aquila; Valeria Maggi, Bari; Chiara Maggioli, Firenze; Emilia Maglione, Napoli; Francesco Manetti, Firenze; Mariangela Manicone, Bari; Andrea Marcocci, Siena; Valentina Mariano, Venezia; Elisa Marinazzo, Torino; Anna Maria Mariniello, Caserta; Giuseppe Marrazzo, Napoli; Emilia Martedì, Napoli; Paolo Martini, Roma; Michela Masin, Padova; Elisa Me, Torino; Marika Menduni, Roma; Chiara Alberta Mesturino, Vicenza; Sabato Mignano, Napoli; Nicola Milano, Salerno; Monica Modugno, Bari; Eleonora Monti, Genova; Mary Mori, Massa-Carrara; Elena Nazzari, Genova; Giuseppe Pietro Nunziata, Napoli; Domenica Oliva, Salerno; Marcello Orio, Salerno; Antonio Pio Palena, Foggia; Pio Paraggio, Salerno; Lisangela Pascale, Bari; Maria Divina Pascuzzo, Torino; Angela Peluso, Napoli; Dorotea Peragine, Bari; Ettore Petraroli, Napoli; Giuliana Petraroli, Torino; Giovanni Paolo Piccolo, Napoli; Marco Piscopo, Napoli; Roberta Poli, Torino; Stella Potenziani, Frosinone; Maria Chiara Quinto, Bari; Andrea Renzullo, Napoli;

Gaetano Emanuele Rizzo, Palermo; Rossella Romano, L'aquila; Ernesto Rossi, Benevento; Ilaria Rubbo, Bolzano/Bozen; Gilda Ruga, Cosenza; Angela Sabbatini, Latina; Francesca Santilli, Pescara; Giovanna Saraceno, Torino; Patrizia Savino, Avellino; Francesco Scalabrì, Napoli; Carla Scarano, Foggia; Maria Pia Scioti, Salerno; Rachele Scotton, Vicenza; Antonello Selleri, Napoli; Antonella Senesi, Vicenza; Marilena Sidoti, Savona; Maria Rosaria Sorrentino, Avellino; Marco Strazzabosco, Verona; Daniela Strippoli, Bari; Miryam Talco, La Spezia; Anna Tedeschi, Pisa; Annamaria Terracciano, Caserta; Gilda Tirelli, Napoli; Domenico Tricò, Pisa; Salvatore Turco, Napoli; Anna Amelia Turco, Napoli; Livio Valente, Frosinone; Valeria Vallone, Padova; Carmela Vinci, Venezia; Danuta Teresa Wolosinska, Roma.

**Figure S1.** Patients selection and flow-chart.

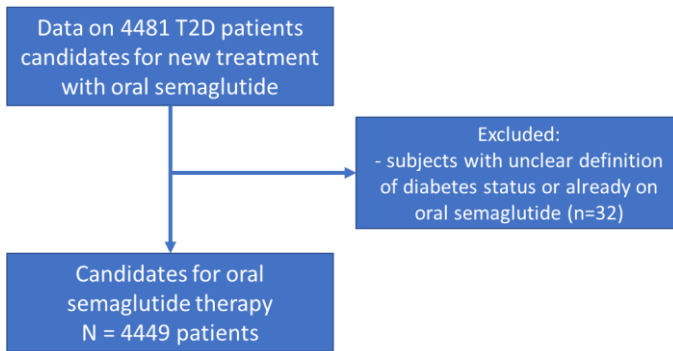

**Figure S2.** Heatmap showing the relationship between main clinical characteristics and reason to choose oral semaglutide as treatment. Note: scale is the log(OR) for the association between each factor and different reasons. Red colors depicted a positive log(OR) meaning that clinical characteristics were associated with higher relevance of specific reason. Cells with \* shows significant association with  $p < 0.05$ , \*\*  $p < 0.0005$ .

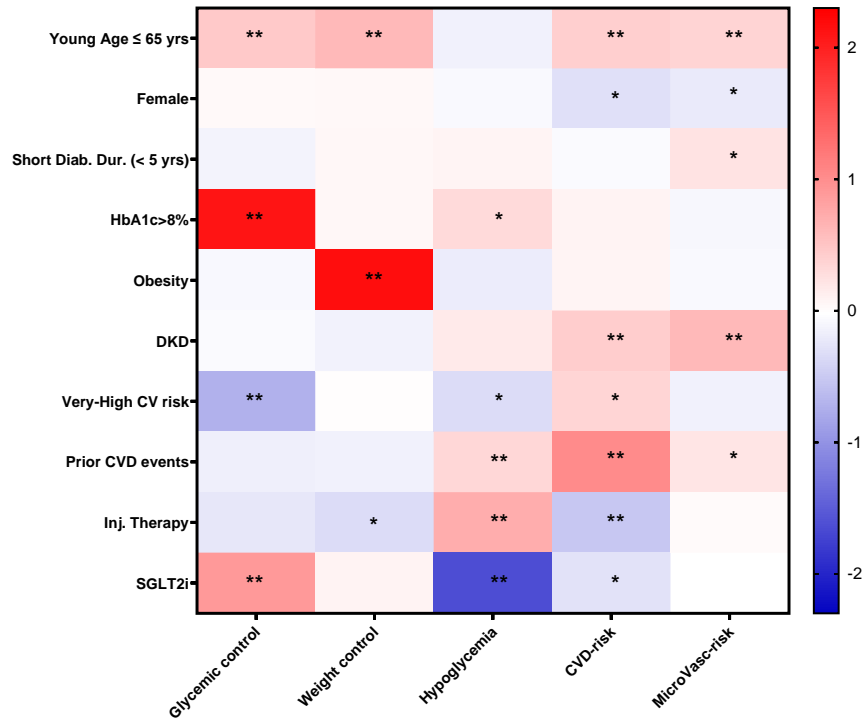

**Table S1.** Expected HbA1c reduction after add-on of oral semaglutide according to background regimen. Mean changes from semaglutide 14 mg or (flexible dosing) vs PLB in each trial was used as reference for expected HbA1c reduction, when PLB arm was not present then the pre-post treatment was used as reference for expected HbA1c reduction adding 0,2% (that is the median changes in PLB groups observed in similar studies, e.g. from - 1.3% observed as pre-post to -1.1% used as expected reduction).

| Condition 1<br>(change in<br>treatments) | Condition 2 (Background therapy) | Expected response<br>on Hba1c % | Expected<br>response<br>similar to: |
|------------------------------------------|----------------------------------|---------------------------------|-------------------------------------|
| IF                                       | AND No treatment                 | - 1.1                           | Pioneer 1                           |
| ELSE IF                                  | AND Metformin alone              | - 1.1                           | Pioneer 2                           |
| ELSE IF                                  | AND Metformin + SU               | - 1.1                           | Pioneer 3                           |
| ELSE IF                                  | AND Metformin + SGLT2i           | - 1.0                           | Pioneer 4                           |
| ELSE IF                                  | AND Metformin + Insulin          | - 1.0                           | Pioneer 8                           |
| ELSE IF                                  | AND Mono or dual therapy         | - 1.1                           | Pioneer 7                           |
| ELSE IF                                  | AND DKD                          | - 0.8                           | Pioneer 5                           |
| ELSE                                     |                                  | - 0.7                           | Pioneer 6                           |

**Table S2.** Characteristics of patients according to specific subgroups of background regimen. Continuous variables are presented as mean  $\pm$  standard deviation, while categorical variables are presented as number (%).

| Characteristics                          | Available | Total            | Naive            | Only Metformin   | Metformin + DPP4i | Metformin + SGLT2i | Metformin + SU   | Metformin + Insulin |
|------------------------------------------|-----------|------------------|------------------|------------------|-------------------|--------------------|------------------|---------------------|
| No of Subjects                           |           | 4449             | 425 (10%)        | 1380 (31%)       | 626 (14%)         | 528 (12%)          | 278 (6%)         | 276 (6%)            |
| Female                                   | 99%       | 1736 (39.6%)     | 179 (42.5%)      | 556 (41.1%)      | 254 (41.5%)       | 166 (31.8%)        | 105 (38.3%)      | 98 (35.9%)          |
| Age, years                               | 96%       | 63.4 $\pm$ 10.1  | 56.9 $\pm$ 10.4  | 61.6 $\pm$ 10.1  | 65.2 $\pm$ 9.1    | 64.3 $\pm$ 9.2     | 67.4 $\pm$ 9.3   | 65.3 $\pm$ 9.8      |
| Diabetes Duration < 5 yrs                | 100%      | 1853 (41.8%)     | 385 (90.8%)      | 778 (56.5%)      | 198 (31.7%)       | 149 (28.3%)        | 72 (25.9%)       | 63 (22.8%)          |
| Diabetes Duration 5-10 yrs               | 100%      | 1381 (31.1%)     | 22 (5.2%)        | 387 (28.1%)      | 250 (40.0%)       | 213 (40.4%)        | 105 (37.8%)      | 73 (26.4%)          |
| Diabetes Duration > 10 yrs               | 100%      | 1204 (27.1%)     | 17 (4.0%)        | 211 (15.3%)      | 177 (28.3%)       | 165 (31.3%)        | 101 (36.3%)      | 140 (50.7%)         |
| Active smoker                            | 99%       | 1194 (27.1%)     | 141 (33.3%)      | 343 (25.4%)      | 204 (32.7%)       | 148 (28.2%)        | 77 (28.0%)       | 58 (21.2%)          |
| Good/optimal Diet                        | 93%       | 1069 (25.8%)     | 141 (35.6%)      | 299 (23.2%)      | 143 (25.4%)       | 110 (22.4%)        | 81 (30.0%)       | 66 (24.5%)          |
| Regular physical activity                | 98%       | 608 (13.9%)      | 79 (18.9%)       | 225 (16.5%)      | 69 (11.2%)        | 57 (10.8%)         | 32 (11.8%)       | 47 (17.4%)          |
| Latest HbA1c, %                          | 96%       | 7.9 $\pm$ 1.1    | 8.2 $\pm$ 1.5    | 7.9 $\pm$ 1.2    | 7.9 $\pm$ 0.9     | 7.9 $\pm$ 0.8      | 8.0 $\pm$ 1.0    | 8.2 $\pm$ 1.3       |
| HbA1c personalize target, %              | 82%       | 6.8 $\pm$ 0.3    | 6.6 $\pm$ 0.4    | 6.7 $\pm$ 0.3    | 6.8 $\pm$ 0.3     | 6.7 $\pm$ 0.3      | 6.9 $\pm$ 0.3    | 6.9 $\pm$ 0.4       |
| HbA1c Distance to target, %              | 82%       | 1.2 $\pm$ 1.1    | 1.6 $\pm$ 1.5    | 1.2 $\pm$ 1.2    | 1.0 $\pm$ 0.9     | 1.0 $\pm$ 0.8      | 1.1 $\pm$ 1.0    | 1.3 $\pm$ 1.2       |
| Body mass index, kg/m <sup>2</sup>       | 92%       | 30.6 $\pm$ 5.2   | 31.8 $\pm$ 5.5   | 30.9 $\pm$ 5.2   | 30.1 $\pm$ 4.5    | 30.7 $\pm$ 5.9     | 30.2 $\pm$ 4.6   | 30.0 $\pm$ 5.5      |
| Obesity                                  | 92%       | 2078 (50.5%)     | 257 (62.1%)      | 639 (51.8%)      | 269 (50.0%)       | 232 (47.8%)        | 133 (48.7%)      | 123 (46.1%)         |
| Hypertension                             | 100%      | 3387 (76.1%)     | 267 (62.8%)      | 959 (69.5%)      | 505 (80.7%)       | 448 (84.8%)        | 223 (80.2%)      | 225 (81.5%)         |
| Dyslipidaemia                            | 100%      | 2915 (65.5%)     | 223 (52.5%)      | 901 (65.3%)      | 406 (64.9%)       | 372 (70.5%)        | 194 (69.8%)      | 189 (68.5%)         |
| LDL-Cholesterol, mg/dl                   | 80%       | 97.5 $\pm$ 37.0  | 107.4 $\pm$ 38.7 | 101.0 $\pm$ 36.6 | 98.5 $\pm$ 33.6   | 90.7 $\pm$ 38.8    | 97.0 $\pm$ 37.4  | 93.2 $\pm$ 43.0     |
| Non-HDL Cholesterol, mg/dl               | 81%       | 128.6 $\pm$ 40.8 | 142.4 $\pm$ 47.9 | 132.5 $\pm$ 40.7 | 129.2 $\pm$ 37.8  | 122.3 $\pm$ 41.9   | 128.5 $\pm$ 39.4 | 122.9 $\pm$ 39.4    |
| Renal disease                            | 100%      | 1466 (33.0%)     | 81 (19.1%)       | 284 (20.6%)      | 213 (34.0%)       | 217 (41.1%)        | 106 (38.1%)      | 114 (41.3%)         |
| eGFR (CKD-epi) ml/mi/1.73 m <sup>2</sup> | 85%       | 79.2 $\pm$ 19.9  | 84.1 $\pm$ 20.7  | 83.4 $\pm$ 17.9  | 76.0 $\pm$ 18.2   | 80.0 $\pm$ 18.9    | 76.2 $\pm$ 18.9  | 78.2 $\pm$ 20.2     |
| CKD III stage                            | 85%       | 683 (18.1%)      | 36 (10.2%)       | 107 (9.4%)       | 93 (19.5%)        | 86 (18.9%)         | 53 (21.4%)       | 54 (20.5%)          |
| Micro-albuminuria                        | 92%       | 989 (24.2%)      | 54 (13.8%)       | 189 (15.2%)      | 143 (24.6%)       | 155 (31.6%)        | 71 (27.4%)       | 83 (32.3%)          |
| Macro-albuminuria                        | 92%       | 92 (2.2%)        | 8 (2.1%)         | 10 (0.8%)        | 12 (2.1%)         | 10 (2.0%)          | 9 (3.5%)         | 9 (3.5%)            |
| CVD risk assessments                     |           |                  |                  |                  |                   |                    |                  |                     |
| Very High risk                           | 100%      | 1494 (33.6%)     | 112 (26.4%)      | 374 (27.1%)      | 174 (27.8%)       | 225 (42.6%)        | 101 (36.3%)      | 125 (45.3%)         |
| High risk                                | 100%      | 2703 (60.8%)     | 270 (63.5%)      | 861 (62.4%)      | 428 (68.4%)       | 293 (55.5%)        | 168 (60.4%)      | 145 (52.5%)         |
| Moderate risk                            | 100%      | 252 (5.7%)       | 43 (10.1%)       | 145 (10.5%)      | 24 (3.8%)         | 10 (1.9%)          | 9 (3.2%)         | 6 (2.2%)            |
| No with CVRF $\geq$ 3                    | 100%      | 822 (18.5%)      | 67 (15.8%)       | 234 (17.0%)      | 96 (15.3%)        | 128 (24.2%)        | 55 (19.8%)       | 51 (18.5%)          |
| Complications                            |           |                  |                  |                  |                   |                    |                  |                     |
| Prior CVD events                         | 100%      | 695 (15.6%)      | 56 (13.2%)       | 156 (11.3%)      | 70 (11.2%)        | 106 (20.1%)        | 46 (16.5%)       | 73 (26.4%)          |
| Stroke                                   | 100%      | 147 (3.3%)       | 12 (2.8%)        | 23 (1.7%)        | 18 (2.9%)         | 12 (2.3%)          | 11 (4.0%)        | 15 (5.4%)           |
| Myocardial infarction                    | 100%      | 466 (10.5%)      | 41 (9.6%)        | 105 (7.6%)       | 43 (6.9%)         | 78 (14.8%)         | 36 (12.9%)       | 54 (19.6%)          |
| Angina                                   | 100%      | 68 (1.5%)        | 4 (0.9%)         | 23 (1.7%)        | 8 (1.3%)          | 8 (1.5%)           | 2 (0.7%)         | 4 (1.4%)            |

|               |      |            |           |           |           |            |            |            |
|---------------|------|------------|-----------|-----------|-----------|------------|------------|------------|
| PAD           | 100% | 82 (1.8%)  | 4 (0.9%)  | 20 (1.4%) | 6 (1.0%)  | 11 (2.1%)  | 5 (1.8%)   | 10 (3.6%)  |
| Organ Damage  | 100% | 356 (8.0%) | 20 (4.7%) | 64 (4.6%) | 45 (7.2%) | 66 (12.5%) | 29 (10.4%) | 28 (10.1%) |
| Heart Failure | 100% | 302 (6.8%) | 13 (3.1%) | 31 (2.2%) | 35 (5.6%) | 56 (10.6%) | 16 (5.8%)  | 24 (8.7%)  |
